# Supplementary material for: The synergistic effects between Ce and Cu in CuyCe1−yW5Ox catalysts for enhanced NH3-SCR of NOx and SO2 tolerance
Source: Royal Society of Chemistry journal article supplement (doi:10.1039/c8cy01949e), 2018-12-26
Supplement: c8cy01949e1.pdf [file c8cy01949e1.pdf]

**The synergistic effects between Ce and Cu in  $\text{Cu}_y\text{Ce}_{1-y}\text{W}_5\text{O}_x$  catalysts for enhanced  $\text{NH}_3$ -SCR of  $\text{NO}_x$  and  $\text{SO}_2$  tolerance**

Jian-Wen Shi<sup>a,\*</sup>, Yao Wang<sup>a</sup>, Ruibin Duan<sup>b</sup>, Chen Gao<sup>a</sup>, Baorui Wang<sup>a</sup>, Chi He<sup>c,\*</sup>, Chunming Niu<sup>a</sup>

<sup>a</sup> State Key Laboratory of Electrical Insulation and Power Equipment, Center of Nanomaterials for Renewable Energy, School of Electrical Engineering, Xi'an Jiaotong University, Xi'an 710049, China.

<sup>b</sup>Guangdong Provincial Academy of Building Research Group Co., Ltd., Guangzhou 510530, China

<sup>c</sup>Department of Environmental Science and Engineering, School of Energy and Power Engineering, Xi'an Jiaotong University, Xi'an 710049, China

**Corresponding author:**

Jian-Wen Shi, E-mail: [jianwen.shi@mail.xjtu.edu.cn](mailto:jianwen.shi@mail.xjtu.edu.cn)

Chi He, E-mail: [chi\\_he@xjtu.edu.cn](mailto:chi_he@xjtu.edu.cn)

## Figures and Tables

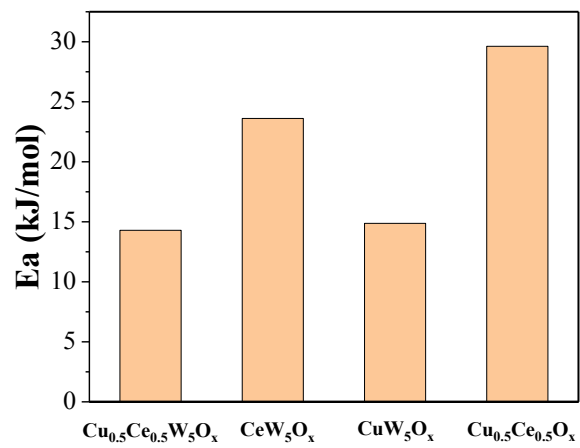

**Fig. S1** The apparent activation energies of the catalysts.

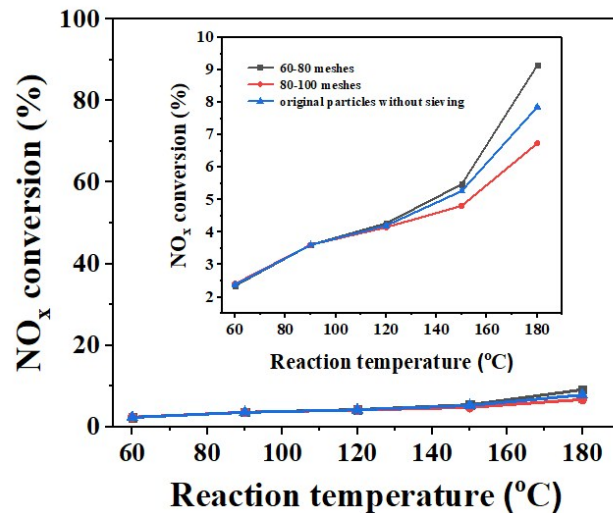

**Fig. S2** The NO<sub>x</sub> conversions as a function of temperature over the Cu<sub>0.5</sub>Ce<sub>0.5</sub>W<sub>5</sub>O<sub>x</sub> catalyst with different pellet particle sizes (60-80 and 80-100 meshes by sieving, and the original catalysts without sieving, respectively) under the GHSV of 216,000 h<sup>-1</sup>.

In order to further ensure the reaction was in the kinetic regime, the SCR de-NO<sub>x</sub> performance of the Cu<sub>0.5</sub>Ce<sub>0.5</sub>W<sub>5</sub>O<sub>x</sub> catalyst was further evaluated under a higher GHSV of 216,000 h<sup>-1</sup>, and three Cu<sub>0.5</sub>Ce<sub>0.5</sub>W<sub>5</sub>O<sub>x</sub> catalysts with different particle sizes were utilized to measure the possible mass-transfer limitation (60-80 and 80-100 meshes by sieving, and the original catalysts without sieving, respectively). As shown in Fig. S4, under such a high GHSV of 216,000 h<sup>-1</sup>, the NO<sub>x</sub> conversions at all temperature points were below 10%, so the reaction was in the kinetic regime. From the inset in Fig. S4, it can be seen that a slight difference can be identified among the three catalysts when the scale of Y-axis was set to 2-10, but the slight difference can be ignored when the scale of Y-axis was set to 0-100, indicating the affection of mass transport limitation can be nearly excluded.

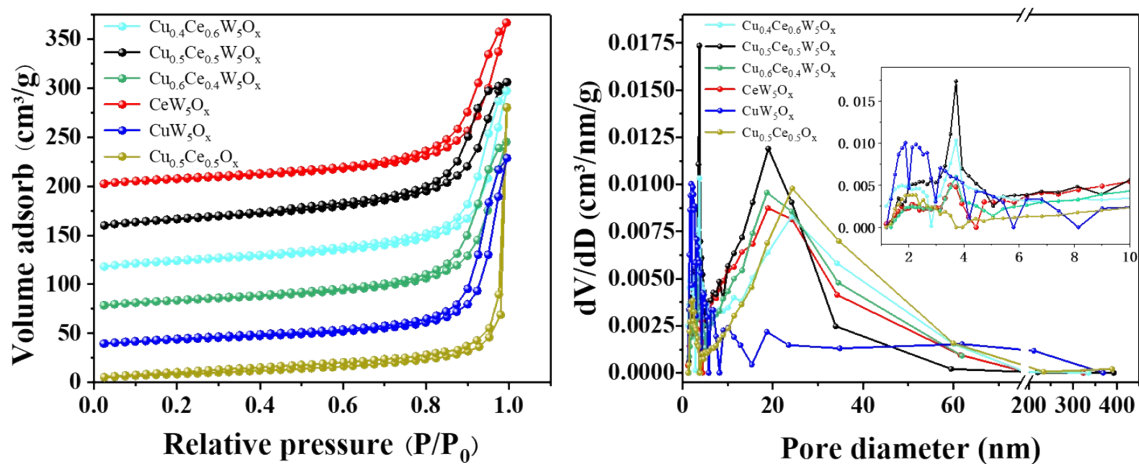

**Fig. S3** Nitrogen adsorption and desorption isotherms (A, left) and pore size distributions (B, right) of all catalysts.

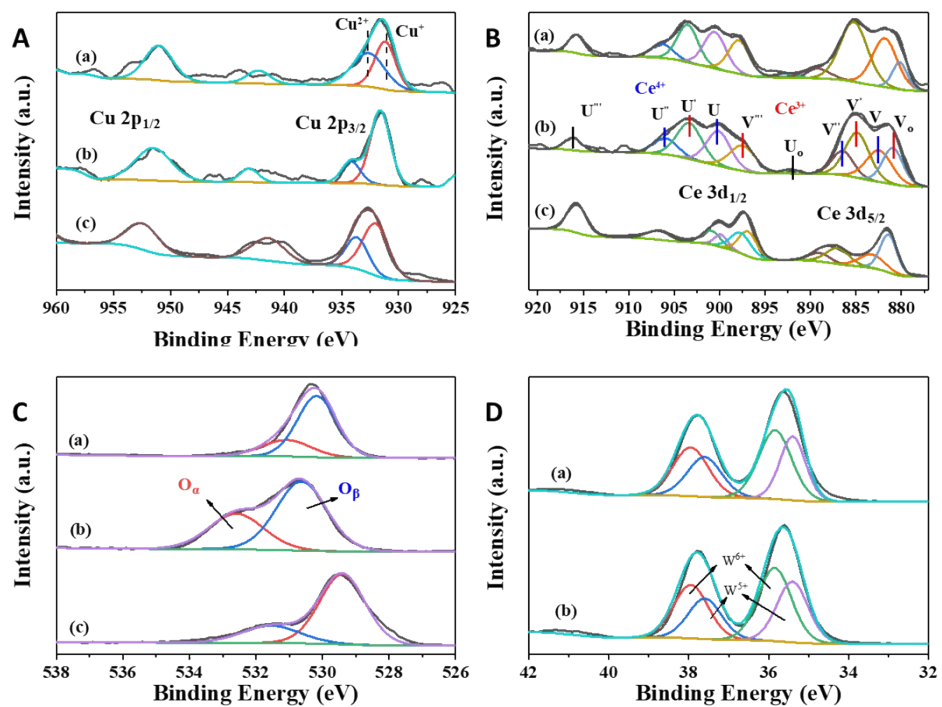

Fig. S4 The high-resolution XPS spectra of Cu2p (A), Ce3d (B), O1s (C) and W4f (D): (a)

$\text{Cu}_{0.4}\text{Ce}_{0.6}\text{W}_5\text{O}_x$ , (b)  $\text{Cu}_{0.6}\text{Ce}_{0.4}\text{W}_5\text{O}_x$ , (c)  $\text{Cu}_{0.5}\text{Ce}_{0.5}\text{O}_x$ .

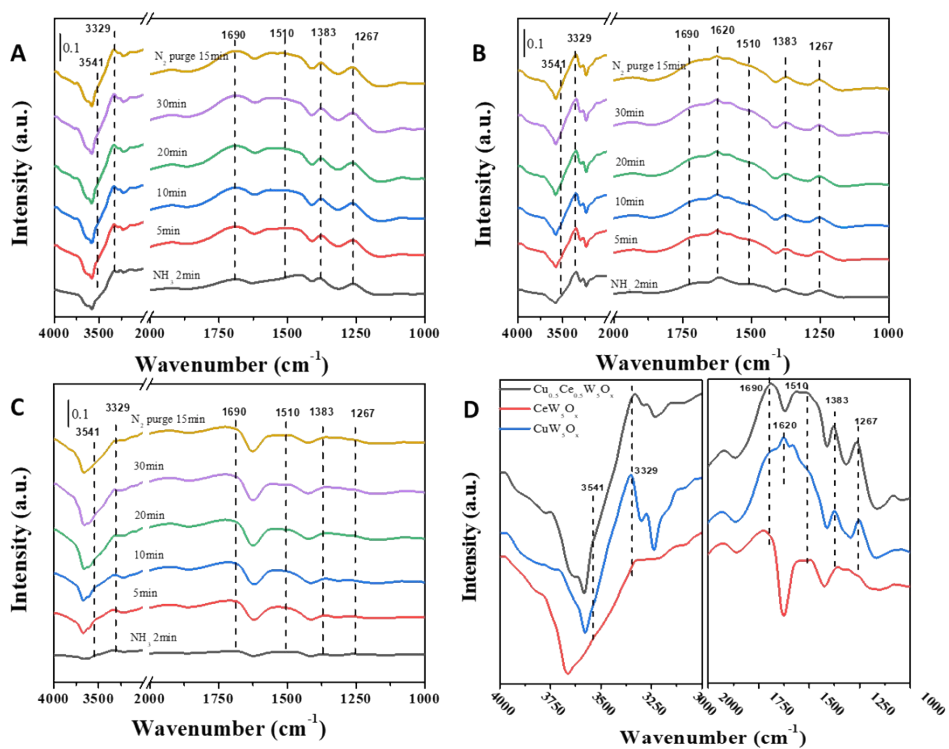

**Fig. S5** In-situ DRIFT spectra of NH<sub>3</sub> adsorption at 210 °C over Cu<sub>0.5</sub>Ce<sub>0.5</sub>W<sub>5</sub>O<sub>x</sub> (A), CuW<sub>5</sub>O<sub>x</sub> (B) and CeW<sub>5</sub>O<sub>x</sub> (C) for 2, 5, 10, 15, 30 min and N<sub>2</sub> purge for 15 min, and the comparison of the in-situ DRIFT spectra over Cu<sub>0.5</sub>Ce<sub>0.5</sub>W<sub>5</sub>O<sub>x</sub>, CuW<sub>5</sub>O<sub>x</sub> and CeW<sub>5</sub>O<sub>x</sub> after N<sub>2</sub> purge for 15 min (D).

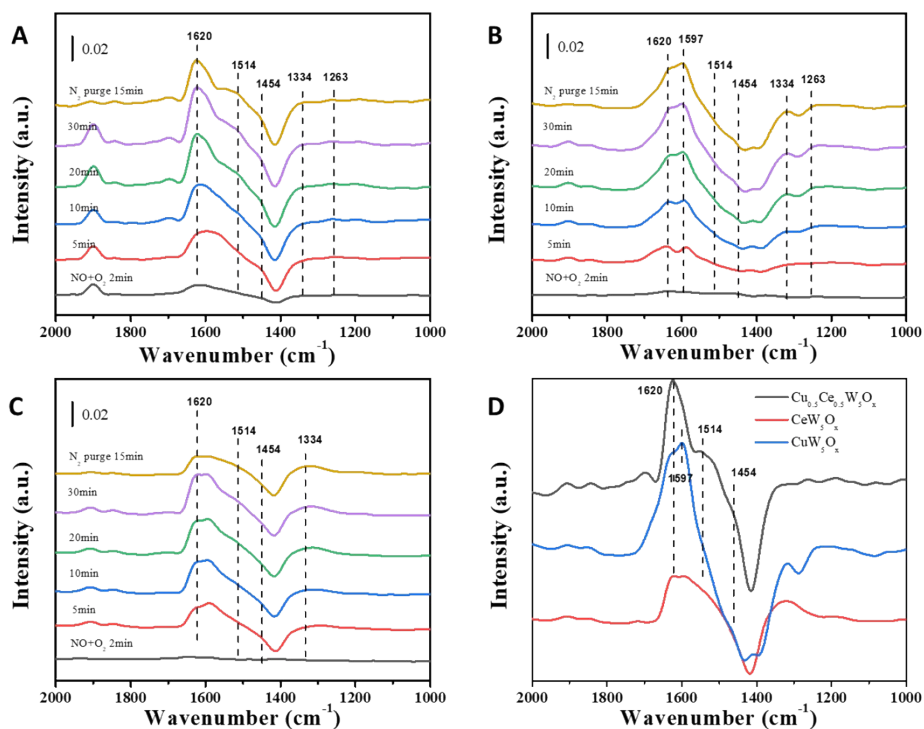

**Fig. S6** In-situ DRIFT spectra of NO+O<sub>2</sub> adsorption at 210 °C over Cu<sub>0.5</sub>Ce<sub>0.5</sub>W<sub>5</sub>O<sub>x</sub> (A), CuW<sub>5</sub>O<sub>x</sub> (B) and CeW<sub>5</sub>O<sub>x</sub> (C) for 2, 5, 10, 15, 30 min and N<sub>2</sub> purge for 15 min, and the comparison of the in-situ DRIFT spectra over Cu<sub>0.5</sub>Ce<sub>0.5</sub>W<sub>5</sub>O<sub>x</sub>, CuW<sub>5</sub>O<sub>x</sub> and CeW<sub>5</sub>O<sub>x</sub> after N<sub>2</sub> purge for 15 min (D).

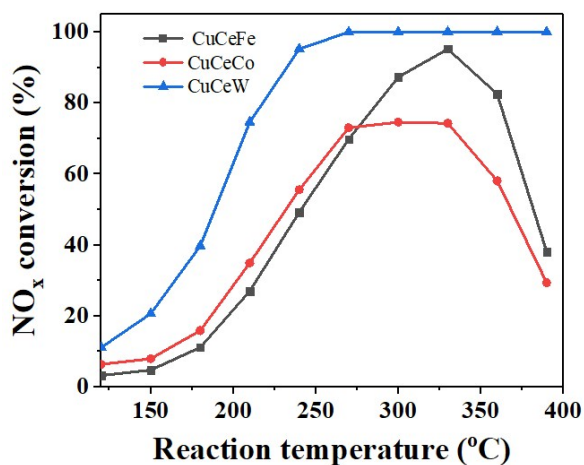

**Fig. S7** The comparison of de-NO<sub>x</sub> performances over three catalysts, the CuCeW, CuCeFe and CuCeCo (reaction conditions: 500 ppm NO, 500 ppm NH<sub>3</sub>, 5 vol.% O<sub>2</sub>, balanced with N<sub>2</sub>, GHSV = 36,000 h<sup>-1</sup>).

**Table S1.** Summary and comparison on the SO<sub>2</sub> tolerance of this work and other literature.

| Catalyst              | Reaction conditions                                                                                            | X <sub>NO</sub> | X <sub>NO-U</sub> | X <sub>NO-A</sub> | Ref.      |
|-----------------------|----------------------------------------------------------------------------------------------------------------|-----------------|-------------------|-------------------|-----------|
| Cu-Ce-W               | 0.05%NH <sub>3</sub> , 0.05%NO, 5%O <sub>2</sub> , 50 ppm SO <sub>2</sub> , 36000 h <sup>-1</sup> , 240 °C     | 95%             | 60%               | 64%               | This work |
| Mn/TiO <sub>2</sub>   | 0.06%NH <sub>3</sub> , 0.06%NO, 5%O <sub>2</sub> , 50 ppm SO <sub>2</sub> , 108000 h <sup>-1</sup> , 150 °C    | 79%             | 54%               | 68%               | 29        |
| MnNb/TiO              | 0.06%NH <sub>3</sub> , 0.06%NO, 5%O <sub>2</sub> , 50 ppm SO <sub>2</sub> , 108000 h <sup>-1</sup> , 150 °C    | 90%             | 80%               | 86%               | 29        |
| CrOx/C                | 0.05%NH <sub>3</sub> , 0.05%NO, 5%O <sub>2</sub> , 50 ppm SO <sub>2</sub> , 30000 h <sup>-1</sup> , 150 °C     | 95%             | 60%               | ~                 | 30        |
| MnCe/TNT              | 0.07%NH <sub>3</sub> , 0.07%NO, 3.5%O <sub>2</sub> , 250 ppm SO <sub>2</sub> , 100000 h <sup>-1</sup> , 300 °C | 93%             | 83%               | 89%               | 31        |
| MnCe/TiO <sub>2</sub> | 0.07%NH <sub>3</sub> , 0.07%NO, 3.5%O <sub>2</sub> , 250 ppm SO <sub>2</sub> , 100000 h <sup>-1</sup> , 300 °C | 70%             | 51%               | 64%               | 31        |
| MnCe                  | 0.05%NH <sub>3</sub> , 0.05%NO, 5%O <sub>2</sub> , 150 ppm SO <sub>2</sub> , 48000 h <sup>-1</sup> , 175 °C    | 87%             | 60%               | 73%               | 32        |
| MgMnCe                | 0.05%NH <sub>3</sub> , 0.05%NO, 5%O <sub>2</sub> , 150 ppm SO <sub>2</sub> , 48000 h <sup>-1</sup> , 175 °C    | 98%             | 70%               | 84%               | 32        |
| FeMn/TiZr             | 0.1%NH <sub>3</sub> , 0.1%NO, 3%O <sub>2</sub> , 100ppm SO <sub>2</sub> , 30000 h <sup>-1</sup> , 150 °C       | 91%             | 44%               | ~                 | 33        |
| MnCe/Ti               | 0.08%NH <sub>3</sub> , 0.08%NO, 3%O <sub>2</sub> , 100 ppm SO <sub>2</sub> , 40000 h <sup>-1</sup> , 150 °C    | 100%            | 62%               | ~                 | 34        |
| Mn/Ti                 | 0.08%NH <sub>3</sub> , 0.08%NO, 3%O <sub>2</sub> , 100 ppm SO <sub>2</sub> , 40000 h <sup>-1</sup> , 150 °C    | 92%             | 27%               | ~                 | 34        |

X<sub>NO</sub>, X<sub>NO-U</sub>, and X<sub>NO-A</sub> represent NO<sub>x</sub> conversion of regular SCR reaction, NO<sub>x</sub> conversion under the tolerance test and after tolerance test, respectively.



**Table S2.** Summary of the results on non-manganese-based catalysts in literature.

| Catalyst   | Preparation method            | Heat-treatment conditions | Reaction conditions                                                        | The best NO <sub>x</sub> conversion | Ref.      |
|------------|-------------------------------|---------------------------|----------------------------------------------------------------------------|-------------------------------------|-----------|
| Cu-Ce-W    | Co-precipitation              | 400 °C/4h                 | 0.05%NH <sub>3</sub> , 0.05%NO, 5%O <sub>2</sub> , 100000 h <sup>-1</sup>  | 100% (270~390 °C)                   | This work |
| Ce-Mo-Ti   | Impregnation method           | 500 °C/4h                 | 0.05%NH <sub>3</sub> , 0.05%NO, 3%O <sub>2</sub> , 71000 h <sup>-1</sup>   | 100% (300~400 °C)                   | 21        |
| Ce-W/Ti-Si | Co-precipitation              | 500 °C/5h                 | 0.05%NH <sub>3</sub> , 0.05%NO, 3%O <sub>2</sub> , 30000 h <sup>-1</sup>   | 100% (250~400 °C)                   | 22        |
| Cu-W-Zr    | Co-precipitation              | 500 °C/3h                 | 0.05%NH <sub>3</sub> , 0.05%NO, 5%O <sub>2</sub> , 30000 h <sup>-1</sup>   | 95% (225~300 °C)                    | 31        |
| Cu-Ce      | Citric acid method            | 350 °C/5h                 | 0.06%NH <sub>3</sub> , 0.06%NO, 5%O <sub>2</sub> , 28000 h <sup>-1</sup>   | 95% (180~210 °C)                    | 32        |
| Cu-Ce-Zr   | Citric acid method            | 500 °C/5h                 | 0.1%NH <sub>3</sub> , 0.1%NO, 3%O <sub>2</sub> , 28000 h <sup>-1</sup>     | 100% (180~240 °C)                   | 33        |
| Cu-Ce      | Co-precipitation              | 350 °C/3h                 | 0.1%NH <sub>3</sub> , 0.1%NO, 5%O <sub>2</sub> , 40000 h <sup>-1</sup>     | 98% (250~350 °C)                    | 34        |
| Ce-ACFN    | Impregnation method           | 350 °C/6h                 | 0.1%NH <sub>3</sub> , 0.1%NO, 5%O <sub>2</sub> , 11000 h <sup>-1</sup>     | 95% (150~270 °C)                    | 35        |
| Fe-Ti      | Co-precipitation              | 550 °C/3h                 | 0.05%NH <sub>3</sub> , 0.05%NO, 2%O <sub>2</sub> , 120000 h <sup>-1</sup>  | 100% (350~400 °C)                   | 36        |
| Cu-Fe-Ti   | Sol-gel method                | 500 °C/3h                 | 0.05%NH <sub>3</sub> , 0.05%NO, 3.5%O <sub>2</sub> , 60000 h <sup>-1</sup> | 90% (200~250 °C)                    | 37        |
| Co-Fe-Ti   | Sol-gel method                | 500 °C/3h                 | 0.05%NH <sub>3</sub> , 0.05%NO, 3.5%O <sub>2</sub> , 60000 h <sup>-1</sup> | 95% (225 °C)                        | 37        |
| Fe-Co      | Hydrothermal method           | 700 °C/4h                 | 0.2%CO, 0.1%NO, 3.5%O <sub>2</sub> , 6000 h <sup>-1</sup>                  | 100% (200~350 °C)                   | 38        |
| Ce-W       | Hydrothermal method           | 400 °C/4h                 | 0.05%NH <sub>3</sub> , 0.05%NO, 3%O <sub>2</sub> , 300000 h <sup>-1</sup>  | 80% (300 °C)                        | 39        |
| Fe-W       | Stepwise urea-assisted method | 500 °C/5h                 | 0.05%NH <sub>3</sub> , 0.05%NO, 3%O <sub>2</sub> , 300000 h <sup>-1</sup>  | 98% (250~400 °C)                    | 40        |

**Table S3.** Structural parameters and  $E_a$  (kJ mol<sup>-1</sup>) of the catalysts.

| Catalyst                                                          | $S_{\text{BET}}$<br>(m <sup>2</sup> /g) | Pore volume<br>(cm <sup>3</sup> /g) | Pore diameter<br>(nm) | $E_a$<br>(kJ mol <sup>-1</sup> ) | Curve area (normalize) |             |
|-------------------------------------------------------------------|-----------------------------------------|-------------------------------------|-----------------------|----------------------------------|------------------------|-------------|
|                                                                   |                                         |                                     |                       |                                  | NH <sub>3</sub> -TPD   | NO-TPD      |
| Cu <sub>0.4</sub> Ce <sub>0.6</sub> W <sub>5</sub> O <sub>x</sub> | 55.3                                    | 0.30                                | 3.72                  | /                                | 1.69                   | 1.43        |
| Cu <sub>0.5</sub> Ce <sub>0.5</sub> W <sub>5</sub> O <sub>x</sub> | <b>64.7</b>                             | 0.25                                | 3.72                  | <b>14.29</b>                     | <b>1.71</b>            | <b>1.64</b> |
| Cu <sub>0.6</sub> Ce <sub>0.4</sub> W <sub>5</sub> O <sub>x</sub> | 53.9                                    | 0.28                                | 18.68                 | /                                | 1.29                   | 1           |
| CeW <sub>5</sub> O <sub>x</sub>                                   | 55.5                                    | 0.27                                | 18.88                 | 23.61                            | 1                      | 1.43        |
| CuW <sub>5</sub> O <sub>x</sub>                                   | 44.4                                    | 0.31                                | 24.32                 | 14.87                            | 1.40                   | 1.10        |
| Cu <sub>0.5</sub> Ce <sub>0.5</sub> O <sub>x</sub>                | 26.9                                    | 0.44                                | 1.88                  | 29.62                            | /                      | /           |

**Table S4.** Relative atomic concentration on the surface of the three catalysts.

| Catalyst                                                          | Surface atomic concentrations (%) |      |       |       | Relative concentration ratios (%) |                      |                    |                   |
|-------------------------------------------------------------------|-----------------------------------|------|-------|-------|-----------------------------------|----------------------|--------------------|-------------------|
|                                                                   | Cu                                | Ce   | W     | O     | Cu <sup>2+</sup> /Cu              | Ce <sup>3+</sup> /Ce | W <sup>5+</sup> /W | O <sub>a</sub> /O |
| Cu <sub>0.5</sub> Ce <sub>0.5</sub> W <sub>5</sub> O <sub>x</sub> | 2.24                              | 3.40 | 22.93 | 47.64 | 28.57                             | 39.3                 | 60.4               | 38.6              |
| CeW <sub>5</sub> O <sub>x</sub>                                   | /                                 | 4.34 | 19.53 | 41.93 | /                                 | 29.5                 | 43.6               | 32.0              |
| CuW <sub>5</sub> O <sub>x</sub>                                   | 3.37                              | /    | 18.58 | 44.10 | 31.51                             | /                    | 26.2               | 24.2              |

**Table S5** The atomic concentration of the Cu<sub>y</sub>Ce<sub>1-y</sub>W<sub>5</sub>O<sub>x</sub> catalysts

| Sample                                                            | Cu (%) | Ce (%) | W (%) | O (%) | Cu/Ce |
|-------------------------------------------------------------------|--------|--------|-------|-------|-------|
| Cu <sub>0.4</sub> Ce <sub>0.6</sub> W <sub>5</sub> O <sub>x</sub> | 0.60   | 1.18   | 47.57 | 50.66 | 0.51  |
| Cu <sub>0.5</sub> Ce <sub>0.5</sub> W <sub>5</sub> O <sub>x</sub> | 1.41   | 1.70   | 40.85 | 56.04 | 0.83  |
| Cu <sub>0.6</sub> Ce <sub>0.4</sub> W <sub>5</sub> O <sub>x</sub> | 0.67   | 0.44   | 48.65 | 50.24 | 1.52  |
